# Supplementary material
Source: PubMed Central journal article supplement (PMC6225987)
Supplement: NIHMS78849-supplement-78849.pdf [file NIHMS78849-supplement-78849.pdf]

## Supplemental Materials

Table 1A. Sensitivity analyses restricting sample to those 19 and older.

| Variable                                       | Unadjusted (Bivariate)<br>Logistic Regression |                     | Adjusted (Multivariate) Logistic Regression <sup>b</sup> |                     |                                       |                     |
|------------------------------------------------|-----------------------------------------------|---------------------|----------------------------------------------------------|---------------------|---------------------------------------|---------------------|
|                                                |                                               |                     | Parental/Perinatal Models<br>Separately                  |                     | Parental/Perinatal Models<br>Combined |                     |
|                                                | OR                                            | [95% CI]            | AOR                                                      | [95% CI]            | AOR                                   | [95% CI]            |
| <b>Parental Risk Factors</b>                   |                                               |                     |                                                          |                     |                                       |                     |
| Age of mother at delivery <25 yrs <sup>a</sup> | <b>1.44</b>                                   | <b>[1.18, 1.74]</b> | 1.12                                                     | [0.88, 1.42]        | -                                     | -                   |
| Age of father at delivery <25 yrs <sup>a</sup> | <b>1.64</b>                                   | <b>[1.30, 2.06]</b> | <b>1.37</b>                                              | <b>[1.04, 1.81]</b> | <b>1.38</b>                           | <b>[1.08, 1.76]</b> |
| Highest parental education                     | <b>0.83</b>                                   | <b>[0.71, 0.98]</b> | <b>0.81</b>                                              | <b>[0.68, 0.96]</b> | <b>0.79</b>                           | <b>[0.66, 0.94]</b> |
| Any parental violent conviction                | <b>2.26</b>                                   | <b>[1.73, 2.96]</b> | <b>2.43</b>                                              | <b>[1.77, 3.33]</b> | <b>2.65</b>                           | <b>[1.94, 3.61]</b> |
| Any parental psychiatric disorder              | <b>1.98</b>                                   | <b>[1.14, 3.45]</b> | 1.26                                                     | [0.64, 2.51]        | -                                     | -                   |
| Any parental substance use disorder            | <b>2.65</b>                                   | <b>[1.43, 4.89]</b> | 1.17                                                     | [0.54, 2.54]        | -                                     | -                   |
| Any parental suicide attempt                   | <b>2.60</b>                                   | <b>[1.30, 5.24]</b> | 1.54                                                     | [0.66, 3.62]        | -                                     | -                   |
| <b>Perinatal Risk Factors</b>                  |                                               |                     |                                                          |                     |                                       |                     |
| No. of older full brothers                     | <b>0.74</b>                                   | <b>[0.62, 0.88]</b> | <b>0.74</b>                                              | <b>[0.62, 0.89]</b> | <b>0.79</b>                           | <b>[0.65, 0.95]</b> |
| Low Apgar (< 7 at 5 min)                       | 0.60                                          | [0.21, 1.69]        | -                                                        | -                   | -                                     | -                   |
| Birth weight (< 2,500 g)                       | 0.88                                          | [0.52, 1.47]        | -                                                        | -                   | -                                     | -                   |
| SGA                                            | <b>1.73</b>                                   | <b>[1.12, 2.68]</b> | <b>1.64</b>                                              | <b>[1.05, 2.56]</b> | 1.65                                  | [0.99, 2.75]        |
| Any congenital malformation                    | <b>1.65</b>                                   | <b>[1.16, 2.35]</b> | <b>1.64</b>                                              | <b>[1.14, 2.36]</b> | <b>1.81</b>                           | <b>[1.24, 2.64]</b> |
| Head circumference (≤ 33 cm)                   | 1.15                                          | [0.91, 1.45]        | -                                                        | -                   | -                                     | -                   |

Table 2A. Sensitivity analyses, restricting analyses to those who are 19 or older by CSEM type.

| Variable                                       | CSEM-Exclusive Offenders                            |                                                             |             |                                              |             |                                                     | Mixed CSEM Offenders                                        |                     |                                       |                     |             |                     |
|------------------------------------------------|-----------------------------------------------------|-------------------------------------------------------------|-------------|----------------------------------------------|-------------|-----------------------------------------------------|-------------------------------------------------------------|---------------------|---------------------------------------|---------------------|-------------|---------------------|
|                                                | Unadjusted<br>(Bivariate)<br>Logistic<br>Regression | Adjusted (Multivariate) Logistic<br>Regression <sup>b</sup> |             |                                              |             | Unadjusted<br>(Bivariate)<br>Logistic<br>Regression | Adjusted (Multivariate) Logistic<br>Regression <sup>b</sup> |                     |                                       |                     |             |                     |
|                                                |                                                     | Parental/Perinatal<br>Models Separately                     |             | Parental/Pe<br>rinatal<br>Models<br>Combined |             |                                                     | Parental/Perinat<br>al Models<br>Separately                 |                     | Parental/Perinatal<br>Models Combined |                     |             |                     |
|                                                |                                                     | OR                                                          | [95% CI]    | AOR                                          | [95% CI]    |                                                     | AOR                                                         | [95% CI]            | OR                                    | [95%<br>CI]         | AO<br>R     | [95% CI]            |
| <b>Parental Risk Factors</b>                   |                                                     |                                                             |             |                                              |             |                                                     |                                                             |                     |                                       |                     |             |                     |
| Age of mother at delivery <25 yrs <sup>a</sup> | <b>1.36</b>                                         | <b>[1.07, 1.73]</b>                                         | 1.10        | [0.82, 1.50]                                 | -           | -                                                   | <b>1.59</b>                                                 | <b>[1.14, 2.20]</b> | 1.23                                  | [0.84, 1.82]        | -           | -                   |
| Age of father at delivery <25 yrs <sup>a</sup> | <b>1.59</b>                                         | <b>[1.20, 2.11]</b>                                         | 1.40        | [0.98, 1.99]                                 | -           | -                                                   | <b>1.72</b>                                                 | <b>[1.17, 2.54]</b> | 1.39                                  | [0.89, 2.18]        | -           | -                   |
| Highest parental education                     | 0.86                                                | [0.71, 1.05]                                                | -           | -                                            | -           | -                                                   | 0.78                                                        | [0.59, 1.02]        | -                                     | -                   | -           | -                   |
| Any parental violent conviction                | <b>1.89</b>                                         | <b>[1.35, 2.65]</b>                                         | <b>2.07</b> | <b>[1.38, 3.10]</b>                          | <b>2.52</b> | <b>[1.74, 3.64]</b>                                 | <b>3.17</b>                                                 | <b>[2.03, 4.96]</b> | <b>3.41</b>                           | <b>[2.09, 5.58]</b> | <b>4.18</b> | <b>[2.57, 6.80]</b> |
| Any parental psychiatric disorder              | <b>2.67</b>                                         | <b>[1.41, 5.08]</b>                                         | 1.46        | [0.65, 3.27]                                 | -           | -                                                   | 0.88                                                        | [0.26, 3.01]        | -                                     | -                   | -           | -                   |
| Any parental substance use disorder            | <b>3.24</b>                                         | <b>[1.56, 6.75]</b>                                         | 1.49        | [0.58, 3.79]                                 | -           | -                                                   | 1.69                                                        | [0.53, 5.36]        | -                                     | -                   | -           | -                   |
| Any parental suicide attempt                   | <b>2.63</b>                                         | <b>[1.22, 5.65]</b>                                         | 1.40        | [0.53, 3.70]                                 | -           | -                                                   | 2.50                                                        | [0.46, 13.6]        | -                                     | -                   | -           | -                   |
| <b>Perinatal Risk Factors</b>                  |                                                     |                                                             |             |                                              |             |                                                     |                                                             |                     |                                       |                     |             |                     |
| No. of older full brothers                     | <b>0.80</b>                                         | <b>[0.65, 0.98]</b>                                         | <b>0.80</b> | <b>[0.64, 0.98]</b>                          | 0.82        | [0.67, 1.01]                                        | <b>0.64</b>                                                 | <b>[0.47, 0.88]</b> | <b>0.64</b>                           | <b>[0.46, 0.88]</b> | <b>0.63</b> | <b>[0.46, 0.88]</b> |

Table 2A continues.

Table 2A Continued.

| Variable                    | CSEM-Exclusive Offenders                         |                      |                                                             |              |                                          |             | Mixed CSEM Offenders                             |                     |                                                             |                     |                                       |                     |
|-----------------------------|--------------------------------------------------|----------------------|-------------------------------------------------------------|--------------|------------------------------------------|-------------|--------------------------------------------------|---------------------|-------------------------------------------------------------|---------------------|---------------------------------------|---------------------|
|                             | Unadjusted<br>(Bivariate) Logistic<br>Regression |                      | Adjusted (Multivariate) Logistic<br>Regression <sup>b</sup> |              |                                          |             | Unadjusted<br>(Bivariate) Logistic<br>Regression |                     | Adjusted (Multivariate) Logistic<br>Regression <sup>b</sup> |                     |                                       |                     |
|                             |                                                  |                      | Parental/Perinatal<br>Models Separately                     |              | Parental/Perinatal<br>Models<br>Combined |             |                                                  |                     | Parental/Perinatal<br>Models Separately                     |                     | Parental/Perinatal<br>Models Combined |                     |
|                             | OR                                               | [95% CI]             | AOR                                                         | [95% CI]     | AO<br>R                                  | [95%<br>CI] | OR                                               | [95% CI]            | AOR                                                         | [95% CI]            | AO<br>R                               | [95% CI]            |
| Low Apgar (< 7 at 5 min)    | 0.55                                             | [0.13, 2.40]         | -                                                           | -            | -                                        | -           | 0.64                                             | [0.15, 2.83]        | -                                                           | -                   | -                                     | -                   |
| Birth weight < 2,500 g      | 1.07                                             | [0.57, 1.98]         | -                                                           | -            | -                                        | -           | 0.61                                             | [0.24, 1.56]        | -                                                           | -                   | -                                     | -                   |
| SGA                         | <b>1.78</b>                                      | <b>[1.001, 3.16]</b> | 1.77                                                        | [0.98, 3.19] | -                                        | -           | 1.68                                             | [0.86, 3.28]        | -                                                           | -                   | -                                     | -                   |
| Any congenital malformation | 1.40                                             | [0.88, 2.24]         | -                                                           | -            | -                                        | -           | <b>2.10</b>                                      | <b>[1.22, 3.60]</b> | <b>1.98</b>                                                 | <b>[1.14, 3.42]</b> | <b>2.15</b>                           | <b>[1.23, 3.76]</b> |
| Head circumference ≤ 33 cm  | 1.01                                             | [0.75, 1.36]         | -                                                           | -            | -                                        | -           | 1.41                                             | [0.98, 2.03]        | -                                                           | -                   | -                                     | -                   |
